# Supplementary material for: Met and Cxcr4 cooperate to protect skeletal muscle stem cells against inflammation-induced damage during regeneration
Source: eLife. 2021 Aug 5;10:e57356. doi: 10.7554/eLife.57356 (PMC8370772; doi:10.7554/eLife.57356)
Supplement: Figure 1—source data 1. [file elife-57356-fig1-data1.xlsx]

## Sheet: Raw Data Figure 1
Figure 1A	2^-DDCT	2^-DDCT	2^-DDCT	2^-DDCT	2^-DDCT	2^-DDCT	2^-DDCT
TNF	uninjured	1dpi	2dpi	3dpi	4dpi	5dpi	7dpi
	4.99287e-06	0.00119646	0.00187554	0.00014401	0.000272986	7.817e-05	2.9337e-05
	1.0227e-05	0.00089626	0.00105278	0.00010781	8.12623e-05	6.5513e-05	3.0142e-05
	5.4432e-06	0.00248155	0.00242914	0.00034412	8.03348e-05	4.7736e-05	2.6611e-05
	4.7324e-06	0.00126288	0.00501655	0.00011806	3.40962e-05	0.00013349	1.6494e-05
	4.42061e-05	0.00060126	0.00085021	1.5042e-05		7.9495e-05	2.1105e-05
	1.29912e-05	0.00066026
	1.26224e-05
	7.18416e-06
	5.00488e-06
	5.81519e-06
Figure 1B	2^-DDCT	2^-DDCT	2^-DDCT	2^-DDCT	2^-DDCT	2^-DDCT	2^-DDCT
Hgf	uninjured	1dpi	2dpi	3dpi	4dpi	5dpi	7dpi
	1.22722e-07	2.5654e-06	4.6332e-06	4.936e-05	2.72245e-06	1.2638e-06	1.8198e-07
	1.5481e-07	3.689e-06	3.8905e-06	3.0387e-05	1.24615e-06	7.0525e-07	3.274e-07
	1.0269e-07	6.0373e-06	1.1575e-05	2.6358e-05	1.2574e-06	1.2844e-06	2.4249e-07
	5.5075e-08	2.5438e-06	1.8031e-05	2.8058e-05	7.95722e-07	2.0152e-06	2.3721e-07
	2.89717e-07	1.9522e-06	1.062e-05	9.2119e-05		1.2176e-06	2.7712e-07
	1.18748e-07	2.0394e-06
	1.12259e-07
	4.25038e-08
	5.03051e-08
	1.10744e-07
Figure 1C	2^-DDCT	2^-DDCT	2^-DDCT	2^-DDCT
Hgf	uninjured	uninjured_muscle cell	3dpi	3dpi muscle cell
	1.22722e-07	1.7593e-06	4.93596e-05	4.783e-08
	1.54813e-07	1.6926e-06	3.03873e-05	7.4753e-08
	1.02688e-07	1.2941e-07	2.63581e-05	8.8845e-08
	5.50747e-08	1.7092e-07	2.80581e-05	2.3777e-07
	2.89717e-07		9.21188e-05	1.0259e-07
	1.18748e-07
	1.12259e-07
	4.25038e-08
	5.03051e-08
	1.10744e-07
Figure 1D	2^-DDCT	2^-DDCT	2^-DDCT	2^-DDCT	2^-DDCT	2^-DDCT
	uninjured	1dpi	2dpi	3dpi	4dpi	7dpi
	0.0226943	0.0377638	0.0540206	0.0520656	0.0584285	0.036049
	0.0159469	0.038389	0.0587303	0.0522133	0.0628049	0.037332
	0.0179937	0.0249522	0.0682877	0.0676773	0.0596487	0.0397184
