# Supplementary material for: Met and Cxcr4 cooperate to protect skeletal muscle stem cells against inflammation-induced damage during regeneration
Source: eLife. 2021 Aug 5;10:e57356. doi: 10.7554/eLife.57356 (PMC8370772; doi:10.7554/eLife.57356)
Supplement: Figure 2—source data 1. [file elife-57356-fig2-data1.xlsx]

## Sheet: Raw Data Figure 2
Figure 2E	Fiber diameter	Pax7iresCre	µm	Pax7iresCre	SEM		coMet	µm	coMet	SEM		Fiber diameter	µm	Pax7iresCre	SEM		coMet	µm	coMet	SEM		Fiber diameter	µm	Pax7iresCre	SEM		coMet	µm	coMet	SEM
	uninjured (µm)		0-5	0	0			0-5	0	0		injured 7dpi (µm)	0-5	0	0			0-5	2.4	0.704924		injured 20dpi (µm)	0-5	0	0			0-5	0.383142	0.383142
			5-10	0.282486	0.399495			5-10	0	0			5-10	1.19858	0.610547			5-10	16.9	3.51372			5-10	0	0			5-10	2.53876	1.6925
			10-15	0.564972	0.798991			10-15	0.317922	0.159307			10-15	2.35904	1.11756			10-15	20.1	2.20029			10-15	0.806452	0.806452			10-15	3.53757	1.12534
			15-20	2.69492	0.982759			15-20	3.6428	1.17734			15-20	12.2024	6.47611			15-20	23.4	4.57111			15-20	2.21682	1.1099			15-20	6.26584	1.11936
			20-25	11.5847	2.00147			20-25	16.5806	1.38723			20-25	20.5968	4.11333			20-25	20.4	0.346936			20-25	6.08086	2.59966			20-25	12.9929	2.49112
			25-30	24.0494	2.05141			25-30	22.6209	1.32779			25-30	23.69	1.49414			25-30	10.9	2.03234			25-30	12.5702	2.24045			25-30	16.4874	3.12531
			30-35	22.4845	1.43619			30-35	23.1187	1.74415			30-35	19.0628	5.36574			30-35	3.3	1.35132			30-35	16.9213	2.29501			30-35	20.1747	4.24097
			35-40	15.0946	0.573276			35-40	15.2941	2.01752			35-40	11.5638	4.38192			35-40	1.4	0.653497			35-40	20.8267	0.520506			35-40	18.3212	2.14596
			40-45	11.4972	2.11733			40-45	11.2098	0.737907			40-45	7.1813	2.96404			40-45	0.5	0.282389			40-45	15.3536	1.65841			40-45	9.11965	2.51874
			45-50	7.92232	0.816968			45-50	3.84664	1.02574			45-50	1.43598	0.775062			45-50	0.3	0.162393			45-50	10.0144	0.931038			45-50	6.96017	2.21086
			50-55	2.9774	1.38225			50-55	2.71571	0.41449			50-55	0.35461	0.35461			50-55	0.2	0.183655			50-55	8.59786	1.91287			50-55	2.14824	0.726926
			55-50	0.282486	0.399495			55-50	0	0			55-50	0.35461	0.35461			55-50	0.2	0.183655			55-50	3.93739	1.72487			55-50	1.07043	0.596516
			60-65	0.564972	0.798991			60-65	0.652821	0.429754			60-65	0	0			60-65	0	0			60-65	2.67432	2.28299			60-65	0	0
			65-70	0	0			65-70	0	0			65-70	0	0			65-70	0	0			65-70	0	0			65-70	0	0
Figure 2J	Fiber diameter	TxGaka	µm	TxGaka	SEM		TxGakaMet	µm	TxGakaMet	SEM		Fiber diameter	µm	TxGaka	SEM		TxGakaMet	µm	TxGakaMet	SEM		Fiber diameter	µm	TxGaka	SEM		TxGakaMet	µm	TxGakaMet	SEM
	uninjured (µm)		0-5	0	0			0-5	0	0		injured 7dpi (µm)	0-5	0.63678	0.16369			0-5	1.94905	0.657425		injured 20dpi (µm)	0-5	0	0			0-5	0.275482	0.275482
			5-10	0	0			5-10	0	0			5-10	3.71533	2.98293			5-10	11.1852	1.46441			5-10	0.266667	0.266667			5-10	1.26218	0.716077
			10-15	0	0			10-15	0.187266	0.187266			10-15	6.88649	2.40394			10-15	21.453	4.64446			10-15	1.95052	1.22537			10-15	2.44634	1.00562
			15-20	0.462963	0.462963			15-20	2.25145	1.71493			15-20	11.2903	2.83403			15-20	23.0199	1.59514			15-20	4.98694	0.289812			15-20	7.39622	1.87591
			20-25	7.25726	4.55069			20-25	5.81937	1.66397			20-25	24.6347	2.33687			20-25	24.6821	2.26003			20-25	9.36728	2.01916			20-25	16.8441	2.3669
			25-30	15.7282	5.31156			25-30	19.3842	4.85331			25-30	25.1744	4.21905			25-30	11.1787	4.71313			25-30	17.7195	4.23067			25-30	17.0023	1.77753
			30-35	23.8488	2.01874			30-35	21.8621	1.9137			30-35	16.8975	2.92027			30-35	4.40883	1.71835			30-35	19.0162	0.690539			30-35	19.6558	2.60241
			35-40	19.7573	1.81535			35-40	19.1103	3.11474			35-40	7.83793	1.18389			35-40	1.91083	1.91083			35-40	17.4229	1.32386			35-40	17.148	1.35852
			40-45	12.1684	1.55884			40-45	16.1271	4.04311			40-45	2.4163	0.579615			40-45	0.212314	0.212314			40-45	15.6039	3.87577			40-45	9.32201	1.68732
			45-50	9.44695	2.6476			45-50	8.84125	2.62644			45-50	0.340136	0.340136			45-50	0	0			45-50	8.06862	1.7086			45-50	5.93839	2.12417
			50-55	8.08934	3.51494			50-55	4.42633	0.471576			50-55	0.170068	0.170068			50-55	0	0			50-55	4.40835	0.621263			50-55	2.13164	0.277564
			55-50	1.62037	1.009			55-50	1.38801	0.160132			55-50	0	0			55-50	0	0			55-50	0.57193	0.389442			55-50	0.141844	0.141844
			60-65	1.62037	1.009			60-65	0.602502	0.32983			60-65	0	0			60-65	0	0			60-65	0.617182	0.115446			60-65	0.43573	0.43573
			65-70	0	0			65-70	0	0			65-70	0	0			65-70	0	0			65-70	0	0			65-70	0	0
Figure 2O	Fiber diameter	TxFan	µm	TxFan	SEM		TxFanMet	µm	TxFanMet	SEM		Fiber diameter	µm	TxFan	SEM		TxFanMet	µm	TxFanMet	SEM		Fiber diameter	µm	TxFan	SEM		TxFanMet	µm	TxFanMet	SEM
	uninjured (µm)		0-5	0	0			0-5	0	0		injured 7dpi (µm)	0-5	0	0			0-5	0.555556	0.555556		injured 20dpi (µm)	0-5	0.26455	0.26455			0-5	0.775194	0.775194
			5-10	0	0			5-10	0	0			5-10	2.978	1.18253			5-10	13.0983	5.16816			5-10	1.31912	0.249951			5-10	9.06008	6.20325
			10-15	0	0			10-15	0.156495	0.156495			10-15	4.68526	0.947326			10-15	26.2607	7.8081			10-15	2.39215	1.21085			10-15	14.4186	3.0969
			15-20	3.39249	1.41802			15-20	2.59419	0.8924			15-20	10.3813	5.77834			15-20	25.8333	4.81453			15-20	6.91189	3.37413			15-20	14.1182	4.99956
			20-25	10.5215	0.836972			20-25	10.1609	0.874289			20-25	22.294	6.64524			20-25	15.235	1.82602			20-25	15.8884	6.34888			20-25	13.1686	2.04365
			25-30	17.0609	0.914756			25-30	26.4223	4.27347			25-30	24.2855	2.19873			25-30	9.33761	5.57979			25-30	16.6737	2.9248			25-30	20.8043	6.24868
			30-35	20.5092	2.93148			30-35	24.8292	3.50249			30-35	16.372	5.39252			30-35	6.66667	3.44965			30-35	17.7434	2.3754			30-35	9.95155	1.4914
			35-40	17.5155	2.13134			35-40	17.6687	0.904877			35-40	11.2118	3.79868			35-40	2.37179	1.38823			35-40	14.0235	3.32354			35-40	7.86822	3.0443
			40-45	13.6279	0.435388			40-45	9.31508	2.76287			40-45	5.06944	2.62574			40-45	0.641026	0.641026			40-45	12.7723	3.73233			40-45	4.76744	1.3477
			45-50	8.11318	1.39272			45-50	4.83851	2.88368			45-50	1.45541	0.971038			45-50	0	0			45-50	6.97654	3.81316			45-50	2.74225	1.00369
			50-55	6.58937	0.975267			50-55	3.31915	1.20465			50-55	1.26736	0.656435			50-55	0	0			50-55	3.19588	1.23821			50-55	0.775194	0.775194
			55-50	2.04638	1.41625			55-50	0.348454	0.176486			55-50	0	0			55-50	0	0			55-50	1.30682	0.927664			55-50	1.55039	1.55039
			60-65	0.623613	0.0348253			60-65	0.346971	0.175964			60-65	0	0			60-65	0	0			60-65	0.531622	0.266121			60-65	0	0
			65-70	0	0			65-70	0	0			65-70	0	0			65-70	0	0			65-70	0	0			65-70	0	0
