# Supplementary material for: Met and Cxcr4 cooperate to protect skeletal muscle stem cells against inflammation-induced damage during regeneration
Source: eLife. 2021 Aug 5;10:e57356. doi: 10.7554/eLife.57356 (PMC8370772; doi:10.7554/eLife.57356)
Supplement: Figure 3—source data 1. — Quantification of recombination efficiency of the Metflox allele represented in the diagrams shown in B, C and D (Figure 3—figure supplement 1). [file elife-57356-fig3-data1.xlsx]

## Sheet: Raw Data Figure 3
Figure 3E	Pax7+ cells /mm2	Pax7iresCre	coMet
		19.792	23.9286
		21.4187	16.315
		17.8941	22.569
		26.5717	28.8231
		16.5396	24.4725
		21.4201	23.9286
Figure 3F	Pax7+ cells /mm2	Pax7iresCre	coMet		Pax7iresCre	coMet
		211.196	37.7964		56.1225	27.2479
		211.205	87.489		47.5821	32.9415
		189.515	69.8825		69.5431	31.7214
Figure 3K	Pax7+ cells /mm2	TxGaka	TxGakaMet
		21.0685	13.2199
		18.4421	13.8502
		23.0455	28.7391
		23.5877	18.7075
		19.251
		16.2684
Figure 3L	Pax7+ cells /mm2	TxGaka	TxGakaMet		TxGaka	TxGakaMet
		252.567	74.8707		90.8941	47.5821
		230.198	41.8074		79.3036	35.9916
		289.171	88.8406		67.713	48.1922
					82.9637
Figure 3Q	Pax7+ cells /mm2	TxFan	TxFanMet
		20.7322	13.0139
		28.2665	16.2674
		27.425	8.94707
Figure 3R	Pax7+ cells /mm2	TxFan	TxFanMet		TxFan	TxFanMet
		152.27	8.46247		42.7019	13.2533
		116.244	12.6937		34.1615	12.5558
		211.948	12.2842		41.4819	16.0435
		193.394

## Sheet: Raw Data Figure 3 supplement
Figure 3 - figure supplement 1B	control	Average 2^-DDCT	SEM		coMet	Average 2^-DDCT	SEM
	E17/E18	0.0076508	0.00048356		E17/E18	8.342e-05	7.886e-05
	E20/E21	0.00772036	7.199e-05		E20/E21	0.00660738	0.00164598
Figure 3 - figure supplement 1C	control	Average 2^-DDCT	SEM		TxGakaMet	Average 2^-DDCT	SEM
	E17/E18	0.0269858	0.00107382		E17/E18	6.828e-05	6.326e-05
	E20/E21	0.0361219	0.00156069		E20/E21	0.0339462	0.00881454
Figure 3 - figure supplement 1D	control	Average 2^-DDCT	SEM		TxFanMet	Average 2^-DDCT	SEM
	E17/E18	0.00601339	0.00399146		E17/E18	0.00011491	4.55e-06
	E20/E21	0.0224097	0.00215912		E20/E21	0.019369	0.00271516
