# Supplementary material for: Met and Cxcr4 cooperate to protect skeletal muscle stem cells against inflammation-induced damage during regeneration
Source: eLife. 2021 Aug 5;10:e57356. doi: 10.7554/eLife.57356 (PMC8370772; doi:10.7554/eLife.57356)
Supplement: Figure 4—source data 1. [file elife-57356-fig4-data1.xlsx]

## Sheet: Raw Data Figure 4
Figure 2A	Average 2^-DDCT	Average 2^-DDCT	Average 2^-DDCT	Average 2^-DDCT	Average 2^-DDCT	Average 2^-DDCT	Average 2^-DDCT
Cxcl12	uninjured	1dpi	2dpi	3dpi	4dpi	5dpi	7dpi
	0.00213425	0.012632	0.0276556	0.0117447	0.0121121	0.0112369	0.00512397
	0.00405903	0.0146142	0.0188653	0.0209907	0.00839258	0.00579478	0.00322548
	0.00279879	0.0275602	0.0419896	0.0287494	0.00849604	0.00680587	0.00417369
	0.00276556	0.0144311	0.0501761	0.0115904	0.00795139	0.0150344	0.00444801
	0.00428695	0.00976313	0.0204396	0.00545124		0.00908369	0.00338313
	0.00363217	0.0110395
	0.00276556
	0.00276742
	0.00363217
	0.00230998
Figure 2B	Average 2^-DDCT	Average 2^-DDCT	Average 2^-DDCT	Average 2^-DDCT
Cxcl12	uninjured	uninjured_muscle cell	3dpi	3dpi muscle cell
	0.00213425	0.0146129	0.0117447	0.00191287
	0.00405903	0.0166449	0.0209907	0.00239669
	0.00279879	0.00831781	0.0287494	0.00221323
	0.00276556	0.0124185	0.0115904
	0.00428695		0.00545124
	0.00363217
	0.00276556
	0.00276742
	0.00363217
	0.00230998
Figure 2C	Average 2^-DDCT	Average 2^-DDCT	Average 2^-DDCT	Average 2^-DDCT	Average 2^-DDCT	Average 2^-DDCT
Cxcr4	uninjured	1dpi	2dpi	3dpi	4dpi	7dpi
	0.243991	0.0365057	0.0172284	0.0184005	0.128801	0.204054
	0.192686	0.0609099	0.0164528	0.026152	0.111342	0.248882
	0.167237	0.0468301	0.0208443	0.0365908	0.0980893	0.252278
