# Supplementary material for: Met and Cxcr4 cooperate to protect skeletal muscle stem cells against inflammation-induced damage during regeneration
Source: eLife. 2021 Aug 5;10:e57356. doi: 10.7554/eLife.57356 (PMC8370772; doi:10.7554/eLife.57356)
Supplement: Figure 5—source data 1. [file elife-57356-fig5-data1.xlsx]

## Sheet: Raw Data Figure 5
Figure 5E	Fiber diameter	TxGaka	µm	TxGaka	SEM		TxCxcr4	µm	TxGakaCxcr4	SEM		TxMet	µm	TxGakaMet	SEM		TxCxcr4Met	µm	TxGakaCxcr4Met	SEM
	uninjured (µm)		0-5	0	0			0-5	0	0			0-5	0	0			0-5	0	0
			5-10	0	0			5-10	0	0			5-10	0	0			5-10	0	0
			10-15	0	0			10-15	0	0			10-15	0.187266	0.187266			10-15	0.171821	0.171821
			15-20	0.462963	0.462963			15-20	0	0			15-20	2.25145	1.71493			15-20	1.86132	0.775121
			20-25	7.25726	4.55069			20-25	4.43236	0.121075			20-25	5.81937	1.66397			20-25	8.50618	1.03605
			25-30	15.7282	5.31156			25-30	11.1347	2.66769			25-30	19.3842	4.85331			25-30	19.1799	4.70821
			30-35	23.8488	2.01874			30-35	24.2323	2.79767			30-35	21.8621	1.9137			30-35	19.5375	0.891928
			35-40	19.7573	1.81535			35-40	22.4525	2.5216			35-40	19.1103	3.11474			35-40	24.3996	0.873567
			40-45	12.1684	1.55884			40-45	17.8567	1.73855			40-45	16.1271	4.04311			40-45	13.4743	3.33252
			45-50	9.44695	2.6476			45-50	9.75	2.17195			45-50	8.84125	2.62644			45-50	6.53206	1.15959
			50-55	8.08934	3.51494			50-55	6.1807	1.79164			50-55	4.42633	0.471576			50-55	4.5488	0.54672
			55-50	1.62037	1.009			55-50	3.01922	1.46002			55-50	1.38801	0.160132			55-50	1.36868	0.184596
			60-65	1.62037	1.009			60-65	0.941544	0.663533			60-65	0.602502	0.32983			60-65	0.419927	0.214305
			65-70	0	0			65-70	0	0			65-70	0	0			65-70	0	0
	Fiber diameter	TxGaka	µm	TxGaka	SEM		TxCxcr4	µm	TxGakaCxcr4	SEM		TxMet	µm	TxGakaMet	SEM		TxCxcr4Met	µm	TxGakaCxcr4Met	SEM
	injured (µm)		0-5	0.63678	0.16369			0-5	0	0			0-5	1.94905	0.657425			0-5	3.31666	1.65878
			5-10	3.71533	2.98293			5-10	0.568182	0.463919			5-10	11.1852	1.46441			5-10	26.5621	6.88705
			10-15	6.88649	2.40394			10-15	2.08333	0.773198			10-15	21.453	4.64446			10-15	29.0213	3.14755
			15-20	11.2903	2.83403			15-20	8.8447	1.19072			15-20	23.0199	1.59514			15-20	24.6007	5.47935
			20-25	24.6347	2.33687			20-25	20.8712	1.26804			20-25	24.6821	2.26003			20-25	11.4275	3.38431
			25-30	25.1744	4.21905			25-30	24.2045	3.433			25-30	11.1787	4.71313			25-30	4.66268	2.50436
			30-35	16.8975	2.92027			30-35	23.5038	1.09794			30-35	4.40883	1.71835			30-35	0.408998	0.408998
			35-40	7.83793	1.18389			35-40	11.6288	2.56702			35-40	1.91083	1.91083			35-40	0	0
			40-45	2.4163	0.579615			40-45	4.69697	0.123712			40-45	0.212314	0.212314			40-45	0	0
			45-50	0.340136	0.340136			45-50	2.08333	0.773198			45-50	0	0			45-50	0	0
			50-55	0.170068	0.170068			50-55	1.21212	0.989693			50-55	0	0			50-55	0	0
			55-50	0	0			55-50	0	0			55-50	0	0			55-50	0	0
			60-65	0	0			60-65	0.30303	0.247423			60-65	0	0			60-65	0	0
			65-70	0	0			65-70	0	0			65-70	0	0			65-70	0	0
Figure 5J	Pax7+ cells /mm2	TxGaka	TxGakaCxcr4	TxGakaMet	TxGakaCxcr4Met
		252.567	212.29	74.8707	15.8607
		230.198	217.644	41.8074	17.0808
		289.171	251.602	88.8406	15.5557

## Sheet: Raw Data Figure 5 supplement 1
Figure 5 - figure supplement 1E	Pax7+/mm2	TxGaka	TxGakaCxcr4	TxGakaMet	TxGakaCxcr4Met
		21.0685	20.3342	13.2199	20.8765
		18.4421	20.3342	13.8502	21.4187
		23.0455	16.1657	28.7391	17.623
		23.5877		18.7075
		19.251
		16.2684

## Sheet: Raw Data Figure 5 supplement 2
Figure 5 - figure supplement 2E	F4/80 positive area (%)	TxGaka	TxGakaCxcr4	TxGakaMet	TxGakaCxcr4Met
		5.452	4.599	15.816	28.038
		7.494	6.109	15.164	22.884
		7.857	2.937	12.189	24.789
		5.02
		2.916
		2.93
Figure 5 - figure supplement 2F	Fibronectin positive area (%)	TxGaka	TxGakaCxcr4	TxGakaMet	TxGakaCxcr4Met
		22.207	22.48	32.825	37.973
		21.774	22.269	44.173	39.822
		20.203	23.166	42.907	31.577
					34.417
					42.167
