# Supplementary material for: Met and Cxcr4 cooperate to protect skeletal muscle stem cells against inflammation-induced damage during regeneration
Source: eLife. 2021 Aug 5;10:e57356. doi: 10.7554/eLife.57356 (PMC8370772; doi:10.7554/eLife.57356)
Supplement: Figure 6—source data 1. — Quantification of EdU+PAX7+ cells represented in the diagram shown in E (Figure 6—figure supplement 1). Quantification of MYOG+ and PAX7+ cells represented in the diagrams shown in E and F (Figure 6—figure supplement 2). [file elife-57356-fig6-data1.xlsx]

## Sheet: Raw Data Figure 6
Figure 6E	Pax7+TUNEL+/Pax7	TxGaka	TxGakaCxcr4	TxGakaMet	TxGakaCxcr4Met
		11.4943	21.2389	29.8851	46.1538
		8.19672	9.35252	24.2857	33.3333
		9.83607	15.0538	27.2727	40.5405
Figure 6E	Pax7+/mm2	TxGaka	TxGakaCxcr4	TxGakaMet	TxGakaCxcr4Met
		359.916	331.855	82.3537	26.8043
		274.512	505.103	50.4289	56.1225
		478.262	329.415	60.0267	28.3625

## Sheet: Raw Data Figure 6 supplement 1
Figure 6 - figure supplement 1E	EdU+Pax7+/EdU	TxGaka	TxGakaCxcr4	TxGakaMet	TxGakaCxcr4Met
		9.67742	14.1447	12.1693	26.9231
		13.9013	13.8716	20.4301	27.2727
		9.70874	18.3554	28.5714	23.6842
		10.396

## Sheet: Raw Data Figure 6 supplement 2
Figure 6 - figure supplement 2E	MYOG+ cells /mm2	TxGaka	TxGakaCxcr4	TxGakaMet	TxGakaCxcr4Met
		317.214	418.479	70.7632	79.3036
		270.852	468.501	135.833	92.7242
		414.819	407.498	149.66	87.844
Figure 6 - figure supplement 2F	Pax7/MyoG ratio		Pax7	MyoG	Pax7/MyoG
		TxGaka	53.1532	46.8468	0.900901
		TxGaka	50.1114	49.4432	0.445434
		TxGaka	53.2609	46.1957	0.543478
		TxGakaCxcr4	43.871	55.3226	0.806452
		TxGakaCxcr4	51.1111	47.4074	1.48148
		TxGakaCxcr4	44.5545	55.1155	0.330033
		TxGakaMet	41.8301	56.8627	1.30719
		TxGakaMet	34.3396	63.0189	2.64151
		TxGakaMet	40.4389	57.6803	1.88088
		TxGakaCxcr4Met	24.1379	74.7126	1.14943
		TxGakaCxcr4Met	36.7188	59.375	3.90625
		TxGakaCxcr4Met	33.8983	61.0169	5.08475
