# Supplementary material for: Met and Cxcr4 cooperate to protect skeletal muscle stem cells against inflammation-induced damage during regeneration
Source: eLife. 2021 Aug 5;10:e57356. doi: 10.7554/eLife.57356 (PMC8370772; doi:10.7554/eLife.57356)
Supplement: Figure 7—source data 1. — Quantification of TUNEL+ cells represented in the diagram shown in Figure 7—figure supplement 1. [file elife-57356-fig7-data1.xlsx]

## Sheet: Raw Data Figure 7
			%TUNEL+DAPI+/DAPI	%TUNEL+DAPI+/DAPI	%TUNEL+DAPI+/DAPI	%TUNEL+DAPI+/DAPI	%TUNEL+DAPI+/DAPI	%TUNEL+DAPI+/DAPI	%TUNEL+DAPI+/DAPI
Figure 7D	%TUNEL+DAPI+/DAPI	2% Horse	5.96447	5.11182	7.76978	5.44304	6
		2%Horse+120ngTNFalpha	9.04908	9.97442	11.6147	10.8497	16.2044	12.7469	11.2038
		2%Horse+120ngTNalphaF+FCS	6.18705	8.64198	5.34125	7.22071	5.7257
		2%Horse+120ngTNFalpha+SDF	5.4242	8.24891	8.31601
		2%Horse+120ngTNFalpha+HGF	7.28571	5.54675	6.43564	6.88576	4.06091
		2%Horse+120ngTNFalpha+SDFandHGF	3.61248	4.72779	5.64516	5.35248	7.93011
Figure 7G	Pax7+ cells /mm2	control + igG	control+anti-TNFalpha
		460.367	330.635
		359.593	590.507
		485.582	523.404
Figure 7H	Pax7+TUNEL+/Pax7 total	control + igG	control+anti-TNFalpha
		11.6744	11.1666
		4.49438	15.3461
		8.43691	9.82536
Figure 7K	Pax7+ cells /mm2	TxGakaMet + igG	TxGakaMet+anti-TNFalpha
		31.7383	135.203
		55.106	167.453
		78.9388	108.032
Figure 7L	Pax7+TUNEL+/Pax7 total	TxGakaMet + igG	TxGakaMet+anti-TNFalpha
		30.5556	15.7635
		23.6364	16.2304
		29.8969	14.4
			18.0328
Figure 7O	Pax7+ cells /mm2	TxGakaCxcr4Met + igG	TxGakaCxcr4Met+anti-TNFalpha
		26.5687	89.6423
		28.6797	75.4581
		12.8977	69.6995
Figure 7P	Pax7+TUNEL+/Pax7 total	TxGakaCxcr4Met + igG	TxGakaCxcr4Met+anti-TNFalpha
		38.4615	13
		34.6154	16.6667
		40	9.80392
		47.3684	13.5135

## Sheet: Raw Data Figure 7  supplement
		TUNEL+DAPI+/DAPI	TUNEL+DAPI+/DAPI	TUNEL+DAPI+/DAPI
	2% Horse	1.88088	1.96937	1.00334
	2%Horse+60ngTNF	9.31373	12.1118	22.6449
	2%Horse+60ngTNF+60ng anti-TNFalpha	9.66981	8.03213	13.3047
	2%Horse+60ngTNF+180ng anti-TNFalpha	12.9983	6.25	7.76699
	2%Horse+60ngTNF+600ng anti-TNFalpha	1.26904	1.82482	1.68856
	2%Horse+60ngTNF+1800ng anti-TNFalpha	1.06383	2.05479	1.36986
