# Supplementary material for: Met and Cxcr4 cooperate to protect skeletal muscle stem cells against inflammation-induced damage during regeneration
Source: eLife. 2021 Aug 5;10:e57356. doi: 10.7554/eLife.57356 (PMC8370772; doi:10.7554/eLife.57356)
Supplement: Supplementary file 1. — Expression levels of Tnf, Hgf, and Cxcl12 mRNA after acute injury were determined in the entire muscle by qPCR. Uninjured and 1–7 days post injury (dpi) were assessed, and expression was normalized to the expression in the uninjured muscle. The values are displayed as means ± SEM. p-Values are shown in brackets. β-Actin was used for normalization. [file elife-57356-supp1.xlsx]

## Sheet: Sheet1
Supplementary File 1
		TNFα	HGF	Cxcl12
	uninjured	1 ± 0.32	1 ± 0.19	1 ± 0.08
	1 dpi	104.50 ± 27.29	27.06 ± 5.98	4.82 ± 0.84
		(7.9E-05)	(1.9E-05)	(3.7-05)
	2dpi	198.27 ± 66.15	84.08 ± 22.25	10.20 ± 1.97
		(7.3E-04)	(1.0E-04)	(1.2E-05)
	3dpi	12.88 ± 4.78	390.28 ± 107.14	5.04 ± 0.93
		(3.1E-03)	(1.3E-04)	-0.0006
	4dpi	10.35 ± 4.69	12.98 ± 3.62	2.96 ± 0.28
		(6.3E-03)	(1.3E-04)	(1.2E-06)
	5dpi	7.41 ± 1.27	11.59 ± 1.80	3.07 ± 0.59
		(3.1E-05)	(1.9E-06)	(9.8E-05)
	7dpi	2.18 ± 0.32	2.18 ± 0.21	1.31 ± 0.11
		(3.6E-02)	(2.3E-03)	-0.04
